# Supplementary material
Source: Springer Nature journal article supplement (https://www.springermedizin.de/resource/supplementary/12936_2012_2556_MOESM5_ESM.pdf/9543224)
Supplement: MOESM5 [file 9543224]

**A**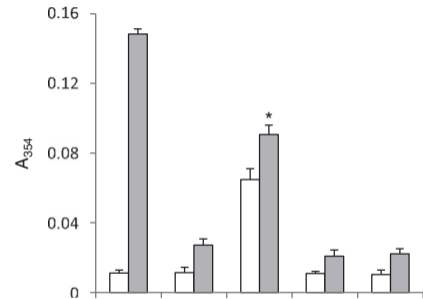

Sample

CuCl<sub>2</sub>  
onlyMBP-*PfCtr369Nt<sup>S</sup>*

MBP only

Ascorbate

-

+

-

+

**B**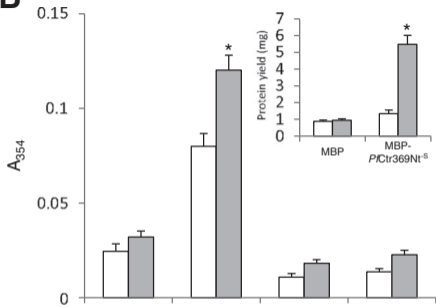

Sample

MBP-*PfCtr369Nt<sup>S</sup>*

MBP only

CuCl<sub>2</sub>

-

+

-

+
